# Supplementary figures and images for: Structure-Based Optimization of One Neutralizing Antibody against SARS-CoV-2 Variants Bearing the L452R Mutation
Source: MDPI journal article supplement (doi:10.3390/v16040566), 2024-04-05

# Supplementary Figure 2

A

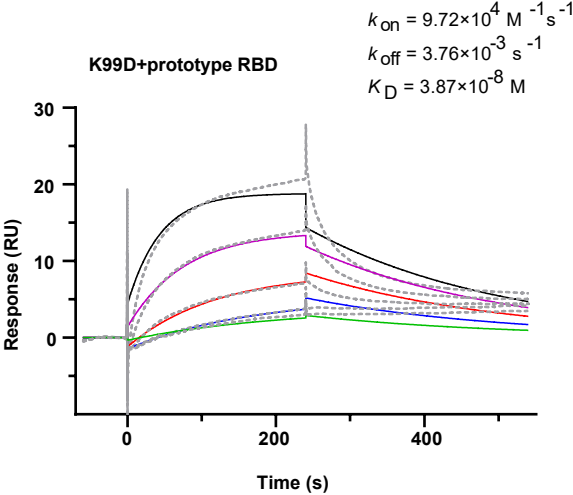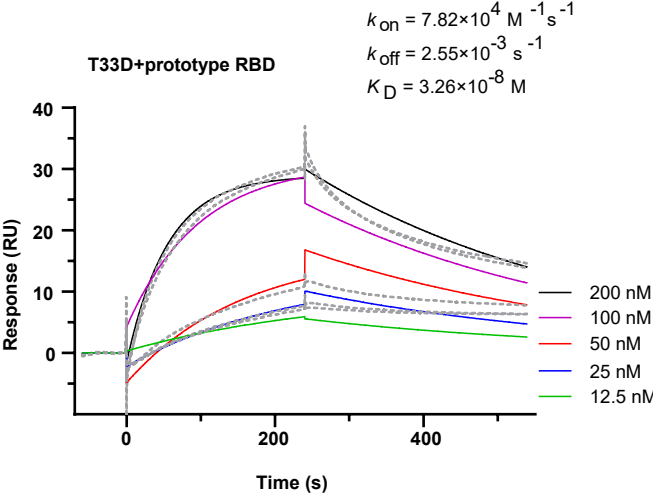

B

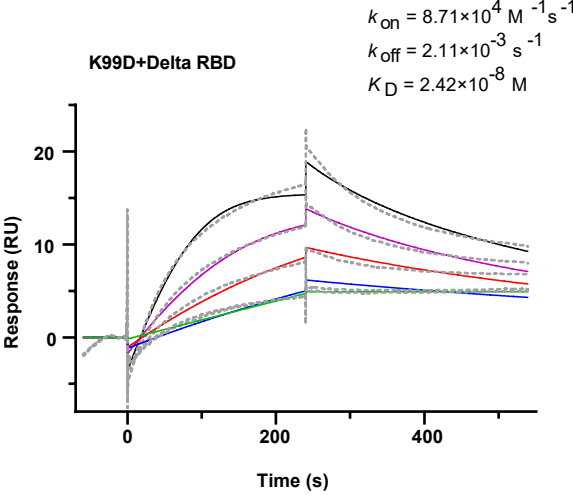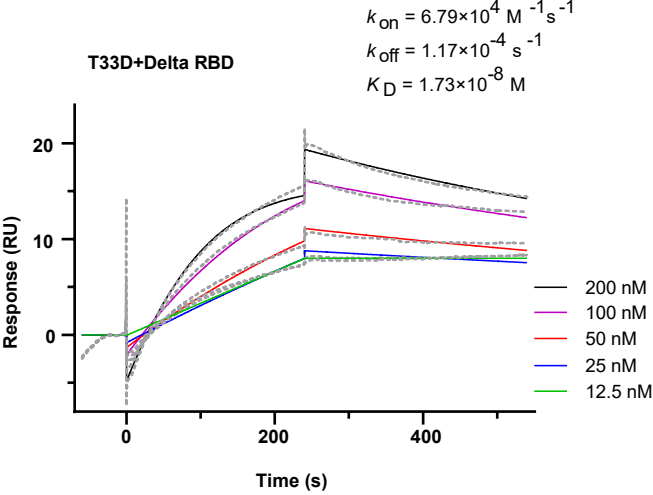

C

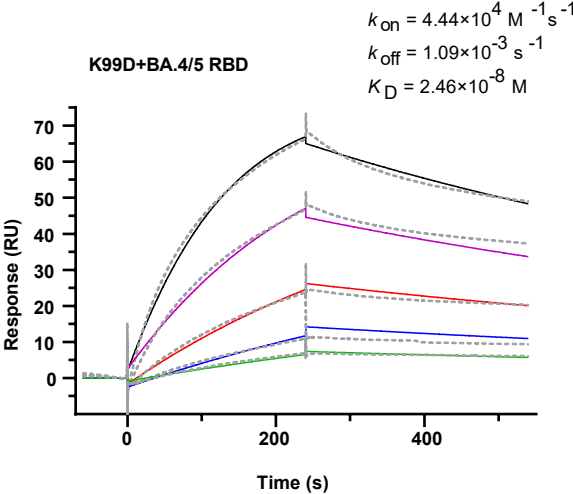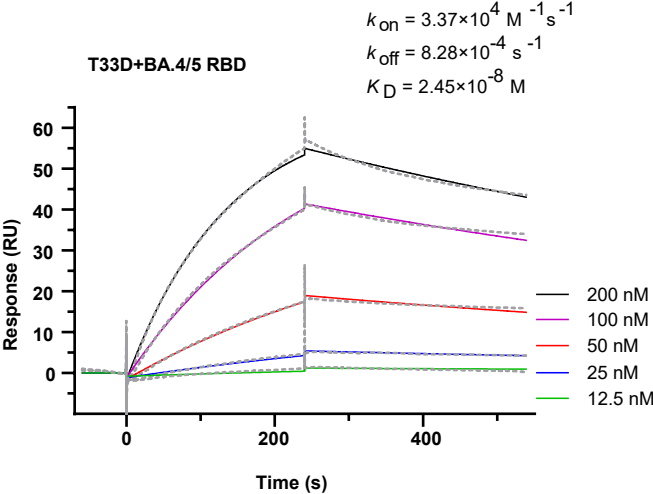

Supplement: s1 [file s1]
